# Supplementary material for: Co-Transplantation of Barcoded Lymphoid-Primed Multipotent (LMPP) and Common Lymphocyte (CLP) Progenitors Reveals a Major Contribution of LMPP to the Lymphoid Lineage
Source: Int J Mol Sci. 2023 Feb 22;24(5):4368. doi: 10.3390/ijms24054368 (PMC10002536; doi:10.3390/ijms24054368)
Supplement: Supplementary file 1 [file ijms-24-04368-s001.zip › lopez_et_al_suppTables.xlsx]

## Sheet: Table_S1
Barcode ID	Barcode Sequences	Specific primer
B1	TGCTGCCGTCAACTAGAACACTCGAGAGGTGGTGCTCTCACTCATCGTGATGGACTGTGAGTGTTGGGGTGTGTCTGTGTGGGGGTATGTGTGTCAGTCTGTCGGGCTCAGAGTGATTATCAAGGGATCCTAAGCGCCTGATTCGAGATC	5'-CTTGATAATCACTCTGAGCCCG
B2	TGCTGCCGTCAACTAGAACACTCGAGGTCTAGGTGTGAGTGTCAGTGGTTTGCTGTGTGTGTCTACGATCCTGTGTGTGTTCTGCCTGCAGTCTCTCTTACTGGGGGACTCAGAGTTTTTGCCCGGATCCTAAGCGCCTGATTCGAGATC	5'-CAGAACACACACAGGATCGTAG
B3	TGCTGCCGTCAACTAGAACACTCGAGTTTATCTCGTCTCAGAGTGAATTGGTCTGTCTCTGTTATGGTTTGTGAGTGTCTGAACGTTCCTGACACTCTTACTCTGGGTCTCTGTGTTACCGCGCGGATCCTAAGCGCCTGATTCGAGATC	5'-AACCATAACAGAGACAGACCAATTC
B4	TGCTGCCGTCAACTAGAACACTCGAGTGATTGGAGACTGTCAGACACACACTCTGAGAGTGATGACTGTGCTGTGTCTCTATCTCTTTGTGTCTCTCAACTGGCCTCTCTGTGTGAGACAGCCTGGATCCTAAGCGCCTGATTCGAGATC	5'-ACAAAGAGATAGAGACACAGCACAG
B6	TGCTGCCGTCAACTAGAACACTCGAGAGGTGTAGGTCTGAGACATGTCTTCTGAGAGTGTGTTCTGGACGCTCAGTCTGTAACTTATTCAGTGAGTGTAGTGGGCCGACTGTGAGTTACCTTTTGGATCCTAAGCGCCTGATTCGAGATC	5'-CAGAACACACTCTCAGAAGACATG
B7	TGCTGCCGTCAACTAGAACACTCGAGTTTCGTTAGTGTCAGTGTTCGGTGCGGTGTGTGTGTGTGTCCAGGTCTCAGACTTAGAGCTTGTCTGAGTGAAGTTGCCGGTCTCAGTCTCACGGTCCGGATCCTAAGCGCCTGATTCGAGATC	5'-CAACTTCACTCAGACAAGCTCTAAG
B10	TGCTGCCGTCAACTAGAACACTCGAGGTGGTACACTCAGTCACAAATTGTGCCTGACAGTCATCCACGCGGAGTGAGAGAAACTGTCTGTGTGTGTGTATGCTCGCCTCTCTGAGTTGAGTATCGGATCCTAAGCGCCTGATTCGAGATC	5'-CAGTCTTGACAGTCACACAAATCTTG
B12	TGCTGCCGTCAACTAGAACACTCGAGTTCCTTTTGTGTCTGTGAGTCACGTGCAGACAGAGTTAGATTGGGTGACTGTGATTCCCTTTCTGAGTGAGTCGGTGGTGGTCTGTGTCAAATACGTCGGATCCTAAGCGCCTGATTCGAGATC	5'-GAATCACAGTCACCCAATCTAACTC
B15	TGCTGCCGTCAACTAGAACACTCGAGTGCTTCGTGTGTGTGAGTTCTACTGTGTGTGTGAGATGGGCCGCCTGAGTCTGAGTAGCGCTGTCTGTGTGAGTCAAGGGGTCTGACACAAGTCTTCTGGATCCTAAGCGCCTGATTCGAGATC	5'-CCCATCTCACACACACAGTAG
B25	TGCTGCCGTCAACTAGAACACTCGAGAGGATATGGTCTGTGTCACGTATGTTGTGAGTGACTTGCGGGTGGTGTGTGTCATGTGTCAACTGTCTGTGATCGATGTTCAGTCTCTGAGCTCTGTTGGATCCTAAGCGCCTGATTCGAGATC	5'-TGAACATCGATCACAGACAGTTG

## Sheet: Table_S2
Cell population	Sample ID	Mouse	BC group	Number of cells	Total read number	Reads aligned exactly 1 time on barcode genomic sequence (%)	Proportion of counts per barcode with i the BC id and j the sample id: Bi,j prop= Bi,j mixNorm / Total mixNorm x100										Proportion of counts per cell type		Raw counts											CPK (Counts Per thousand reads) normalised counts with i the BC id and j the sample id: Bi,j CPK=Bi,j raw count/Total BCj count x 1000										mix Normalised with i the BC id and j the sample id: Bi,j mixNorm = Bi,j CPKx100 / Bi,control CPK
							B1	B4	B6	B12	B25	B2	B3	B7	B10	B15	CLP	LMPP	B1 counts	B2 counts	B3 counts	B4 counts	B6 counts	B7 counts	B10 counts	B13 counts	B15 counts	B25 counts	Total BC counts	B1 CPK	B2 CPK	B3 CPK	B4 CPK	B6 CPK	B7 CPK	B10 CPK	B12 CPK	B15 CPK	B25 CPK	B1 mixNorm	B2 mixNorm	B3 mixNorm	B4 mixNorm	B6 mixNorm	B7 mixNorm	B10 mixNorm	B12 mixNorm	B15 mixNorm	B25 mixNorm
BM Lin-	B00JAA7	M10	LMPP A + CLP B	1464	187 293	77.58	61.2869	3.48035	20.1162	0.017795	0.0709926	0.195961	2.27827	0.25342	0	12.3001	15.0277	84.9723	36323	638	3665	11129	8912	123	0	200	1659	39	62 688	579.425	10.1774	58.4641	177.53	142.164	1.9621	0	3.1904	26.4644	0.622129	48246.8	1368.94	129.899	18.6769	82862.9	0.0597769	0	4131.43	5.83687	5.91824e-05
	B00JA8N	M13	CLP A + LMPP B	59317	424 803	45.8	1.44446	0.0782111	0.702019	0.050923	0.878399	91.0626	0.599935	1.22542	0	3.95807	3.15401	96.846	534	184933	602	156	194	371	0	357	333	301	187 781	2.84374	984.833	3.20586	0.830755	1.03312	1.97571	0	1.90115	1.77334	1.60293	236.789	132468	7.12296	0.087399	602.17	0.0601915	0	2461.91	0.391121	0.000152485
BM B (CD19+)	B00JAA8	M10	LMPP A + CLP B	11918	143 848	63.69	16.4281	0.072531	14.1556	3.22923	46.5242	1.16236	3.72712	7.8396	0	6.86124	19.5903	80.4097	4240	1648	2611	101	2731	1657	0	15805	403	11130	40 326	105.143	40.8669	64.7473	2.50459	67.7231	41.0901	0	391.931	9.99355	276.001	8754.91	5496.92	143.859	0.263493	39473.5	1.25184	0	507533	2.20413	0.0262556
	B00JA8E	M13	CLP A + LMPP B	500000	254 886	25.81	3.06251	0.337066	0.992611	0.115463	0.141263	76.7565	0.589606	17.3657	0	0.639294	4.64891	95.3511	421	57964	220	250	102	1955	0	301	20	18	61 251	6.87336	946.336	3.59178	4.08157	1.66528	31.9178	0	4.91421	0.326525	0.293873	572.322	127289	7.98041	0.429398	970.636	0.972403	0	6363.68	0.072017	2.79558e-05
Spleen B (CD19+)	B00JA8M	M10	LMPP A + CLP B	79423	352 056	89.52	25.0201	0.0690473	10.6562	1.96795	31.3961	1.989	1.99357	8.43674	0	18.4713	30.8906	69.1094	60110	26250	13000	895	19137	16599	0	89658	10099	69915	305 663	196.654	85.8789	42.5305	2.92806	62.6082	54.3049	0	293.323	33.0397	228.732	16374.8	11551.4	94.4966	0.308045	36492.2	1.65444	0	379840	7.28708	0.021759
	B00JA8C	M13	CLP A + LMPP B	424202	323 050	34.89	1.11021	2.04036	2.2309	0.351107	0.586452	11.2676	3.74346	77.7253	0	0.94465	6.31903	93.681	723	40309	6617	7169	1086	41452	0	4336	140	354	102 186	7.07533	394.467	64.7545	70.1564	10.6277	405.652	0	42.4324	1.37005	3.46427	589.139	53058.8	143.875	7.38075	6194.52	12.3585	0	54948.1	0.302172	0.000329552
Thymus DP	B00JA87	M10	LMPP A + CLP B	505961	317 065	82.5	99.8095	0.00145039	0.0821783	0.000618981	0.00759815	0.01104	0.0536242	0.00477774	0	0.0292279	0.0986698	99.9013	255093	155	372	20	157	10	0	30	17	18	255 872	996.956	0.605772	1.45385	0.0781641	0.613588	0.039082	0	0.117246	0.0664395	0.0703477	83013.2	81.4809	3.23025	0.00822319	357.64	0.00119067	0	151.829	0.0146536	6.6921e-06
	B00JA8A	M13	CLP A + LMPP B	500000	408 624	52.11	1.72331	0.0173172	0.388863	0.00670615	0.0643998	96.7722	0.480958	0.329593	0	0.216683	2.20059	97.7994	664	204830	503	36	112	104	0	49	19	23	206 340	3.21799	992.682	2.43772	0.174469	0.542793	0.504022	0	0.237472	0.092081	0.111467	267.951	133523	5.41627	0.0183549	316.376	0.0153555	0	307.516	0.020309	1.06037e-05
Thymus CD4+	B00JA86	M10	LMPP A + CLP B	250168	357 121	78.49	99.5895	0.00452049	0.0642671	0.00183177	0.0207313	0.0578525	0.213613	0.0103786	0	0.0373478	0.319192	99.6808	269496	860	1569	66	130	23	0	94	23	52	272 313	989.655	3.15813	5.76175	0.242368	0.477392	0.0844616	0	0.345191	0.0844616	0.190957	82405.3	424.793	12.8018	0.0254982	278.256	0.00257319	0	447.007	0.0186285	1.81655e-05
	B00JA89	M13	CLP A + LMPP B	470304	384 071	24.86	2.22257	0.0149409	0.508389	0.00789449	0.0745439	92.5354	1.92195	0.133589	0	2.58074	2.82834	97.1717	386	88283	906	14	66	19	0	26	102	12	89 814	4.29777	982.954	10.0875	0.155878	0.734852	0.211548	0	0.289487	1.13568	0.133609	357.861	132215	22.413	0.016399	428.321	0.00644499	0	374.873	0.250481	1.27101e-05
Control	B00JAAV		Mix CB N		180 958	26.13	11.1	11.1	11.1	11.1	11.1	11.1	11.1	11.1	0	11.1	55.55	44.44	602	3307	1634	3248	450	493	0	11416	137	558	21845	27.6	151.4	74.8	148.7	20.6	22.6	0	522.6	6.3	25.5	100	100	100	100	100	100	0	100	100	100
[truncated: 1 more columns]
